# Supplementary material
Source: PubMed Central journal article supplement (PMC117560)
Supplement: pnas_012539199_1.pdf [file pnas_012539199_1.pdf]

**Table 1. Imprinted gene sample**

| LOCUS          | EXPRESSION | REFERENCE | ACCESSION NUMBER | CO-ORDINATES    |
|----------------|------------|-----------|------------------|-----------------|
| 1 TP73         | maternal   | (1)       | NT_004321.3      | 1-100000        |
| 2 CDKN1C       | maternal   | (2)       | NT_009368.3      | 653994-753994   |
| 3 NESP55       | maternal   | (3)       | NT_011430.3      | 565651-665651   |
| 4 SLC22A1L     | maternal   | (4, 5)    | NT_009368.3      | 670546-770546   |
| 5 H19          | maternal   | (6)       | NT_009308.3      | 79145-179145    |
| 6 TSSC3        | maternal   | (7, 8)    | NT_009368.3      | 697571-797571   |
| 7 GNAS1        | maternal   | (9)       | NT_011430.3      | 513733-613733   |
| 8 UBE3A        | maternal   | (10, 11)  | NT_010364.3      | 211076-311076   |
| 9 KCNQ1        | maternal   | (12)      | NT_009368.3      | 297152-397152   |
| 10 ATP10C      | maternal   | (13, 14)  | AC016266.5       | whole BAC       |
| 11 XLalpha5    | paternal   | (3)       | NT_011430.3      | 550433-650433   |
| 12 GNASAS      | paternal   | (15)      | NT_011430.3      | 550000-650000   |
| 13 INS         | paternal   | (16)      | NT_009308.3      | 1-100000        |
| 14 IGF2        | paternal   | (17-19)   | NT_009308.3      | 1-100000        |
| 15 DLK1        | paternal   | (20)      | NT_010028.3      | 1112130-1212130 |
| 16 SNURF-SNRPN | paternal   | (21, 22)  | AC009696.5       | whole BAC       |
| 17 KCNQ1AS     | paternal   | (23, 24)  | NT_009368.3      | 466002-566002   |
| 18 PEG3        | paternal   | (25)      | NT_025138.3      | 316262-416262   |
| 19 MEST        | paternal   | (25)      | NT_007691.3      | 267953-367953   |
| 20 snoRNA      | paternal   | (26)      | AF250841.1       | Whole sequence  |
| 21 IPW         | paternal   | (27)      | AF250841.1       | Whole sequence  |
| 22 MAGEL2      | paternal   | (28)      | NT_010346.3      | 1-100000        |
| 23 ARHI        | paternal   | (29)      | NT_021953.3      | 233546-333546   |
| 24 PLAGL1      | paternal   | (30)      | NT_007174.3      | 131882-231882   |
| 25 COPG2       | paternal   | (31)      | AC009274.9       | Whole BAC       |
| 26 PEG10       | paternal   | (32)      | AC069292.11      | Whole BAC       |
| 27 HYMAI       | paternal   | (33)      | NT_007174.3      | 88022-188022    |
| 28 ZNF215      | paternal   | (34)      | NT_009325.3      | 482859-582859   |
| 29 NDN         | paternal   | (35)      | NT_010346.3      | 21515-121515    |

*Bidirectional imprinting*

|          |                       |                                                                                                                                      |
|----------|-----------------------|--------------------------------------------------------------------------------------------------------------------------------------|
| 30 WT1   | paternal and maternal | Maternally expressed placenta (polymorphic), monoallelic brain (36); paternal expression (low level) in fibroblasts/lymphocytes (37) |
| 31 GRB10 | paternal and maternal | Maternally expressed (38); paternally and maternally expressed (more extensive analysis) (39).                                       |

*excluded*

|               |           |                                                                                     |
|---------------|-----------|-------------------------------------------------------------------------------------|
| UBE3AAS       | maternal  | Excluded as promoter not known (40).                                                |
| MKRN3/MKRN3AS | paternal  | No sequence data (41).                                                              |
| IGF2R         | maternal? | Polymorphic imprinting (42); nonimprinted (43).                                     |
| IGF2AS        | paternal? | Conflicting reports -- not imprinted (44); imprinted (45).                          |
| HTR2A         | maternal? | Fibroblasts with deletions: no nontumour, nonrearranged samples (46).               |
| ASCL2         | maternal? | Described as imprinted, but hydatidiform mole studies only (47); nonimprinted (48). |
| MEG3          | maternal? | Gene described but no imprinting studies (49).                                      |

REFERENCES

- Mai, M., Qian, C., Yokomizo, A., Tindall, D. J., Bostwick, D., Polychronakos, C., Smith, D. I. & Liu, W. (1998) *Oncogene* **17**, 1739-1741.
- Matsuoka, S., Thompson, J. S., Edwards, M. C., Bartlett, J. M., Grundy, P., Kalkin, L. M., Harper, J. W., Elledge, S. J. & Feinberg, A. P. (1996) *Proc. Natl. Acad. Sci. USA* **93**, 3026-3030.
- Hayward, B. E., Moran, V., Strain, L. & Bonthron, D. T. (1998) *Proc. Natl. Acad. Sci. USA* **95**, 15475-15480.
- Cooper, P. R., Smilnich, N. J., Day, C. D., Nowak, N. J., Reid, L. H., Pearsall, R. S., Reece, M., PRAWITT, D., Landers, J., Housman, D. E., et al. (1998) *Genomics* **49**, 38-51.
- Dao, D., Frank, D., Qian, N., O'Keefe, D., Vosatka, R. J., Walsh, C. P. & Tycko, B. (1998) *Hum. Mol. Genet.* **7**, 597-608.
- Zhang, Y., Shields, T., Crenshaw, T., Hao, Y., Moulton, T. & Tycko, B. (1993) *Am. J. Hum. Genet.* **53**, 113-124.
- Qian, N., Frank, D., O'Keefe, D., Dao, D., Zhao, L., Yuan, L., Wang, Q., Keating, M., Walsh, C. & Tycko, B. (1997) *Hum. Mol. Genet.* **6**, 2021-2029.
- Lee, M. P. & Feinberg, A. P. (1998) *Cancer Res.* **58**, 1052-1056.
- Hayward, B. E., Barlier, A., Korbonits, M., Grossman, A. B., Jacquet, P., Enjalbert, A. & Bonthron, D. T. (2001) *J. Clin. Invest.* **107**, R31-R36.
- Albrecht, U., Sutcliffe, J. S., Cattanaach, B. M., Beechey, C. V., Armstrong, D., Eichele, G. & Beaudet, A. L. (1997) *Nat. Genet.* **17**, 75-78.
- Rougeulle, C., Glatt, H. & Lalonde, M. (1997) *Nat. Genet.* **17**, 14-15.
- Lee, M. P., Hu, R. J., Johnson, L. A. & Feinberg, A. P. (1997) *Nat. Genet.* **15**, 181-185.
- Herzing, L. B., Kim, S. J., Cook Jr, E. H. & Ledbetter, D. H. (2001) *Am. J. Hum. Genet.* **68**, 1501-1505.
- Meguro, M., Kashiwagi, A., Mitsuya, K., Nakao, M., Kondo, I., Saitoh, S. & Oshimura, M. (2001) *Nat. Genet.* **28**, 19-20.
- Hayward, B. E. & Bonthron, D. T. (2000) *Hum. Mol. Genet.* **9**, 835-41.
- Moore, G. E., Abu-Amero, S. N., Bell, G., Wakeling, E. L., Kingsnorth, A., Stanier, P., Jauniaux, E. & Bennett, S. T. (2001) *Diabetes* **50**, 199-203.
- Gianoukakis, N., Deal, C., Paquette, J., Goodyer, C. G. & Polychronakos, C. (1993) *Nature Genet.* **4**, 98-101.
- Ohlsson, R., Nystrom, A., Pfeifer-Ohlsson, S., Tohonen, V., Hedberg, F., Schofield, P., Flam, F. & Ekstrom, T. J. (1993) *Nat. Genet.* **4**, 94-97.
- Vu, T. H. & Hoffman, A. R. (1994) *Nature (London)* **371**, 714-717.
- Wylie, A. A., Murphy, S. K., Orton, T. C. & Jirtle, R. L. (2000) *Genome Res.* **10**, 1711-1718.
- Glenn, C. C., Porter, K. A., Jong, M. T., Nicholls, R. D. & Driscoll, D. J. (1993) *Hum. Mol. Genet.* **2**, 2001-2005.
- Gray, T. A., Saitoh, S. & Nicholls, R. D. (1999) *Proc. Natl. Acad. Sci. USA* **96**, 5616-5621.
- Smilnich, N. J., Day, C. D., Fitzpatrick, G. V., Caldwell, G. M., Lossie, A. C., Cooper, P. R., Smallwood, A. C., Joyce, J. A., Schofield, P. N., Reik, W., et al. (1999) *Proc. Natl. Acad. Sci. USA* **96**, 8064-8069.
- Lee, M. P., DeBaun, M. R., Mitsuya, K., Galonek, H. L., Brandenburg, S., Oshimura, M. & Feinberg, A. P. (1999) *Proc. Natl. Acad. Sci. USA* **96**, 5203-5208.
- Murphy, S. K., Wylie, A. A. & Jirtle, R. L. (2001) *Genomics* **71**, 110-117.
- Kobayashi, S., Kohda, T., Miyoshi, N., Kuroiwa, Y., Aisaka, K., Tsutsumi, O., Kaneko-Ishino, T. & Ishino, F. (1997) *Hum. Mol. Genet.* **6**, 781-786.
- Wevrick, R., Kerns, J. A. & Francke, U. (1994) *Hum. Mol. Genet.* **3**, 1877-1882.
- Boccaccio, I., Glatt-Deeley, H., Watrin, F., Roedel, N., Lalonde, M. & Muscatelli, F. (1999) *Hum. Mol. Genet.* **8**, 2497-2505.
- Yu, Y., Xu, F., Peng, H., Fang, X., Zhao, S., Li, Y., Cuevas, B., Kuo, W. L., Gray, J. W., Siciliano, M., Mills, G. B. & Bast, R. C., Jr. (1999) *Proc. Natl. Acad. Sci. USA* **96**, 214-219.
- Kamiya, M., Judson, H., Okazaki, Y., Kusakabe, M., Muramatsu, M., Takada, S., Takagi, N., Arima, T., Wake, N., Kamimura, K., et al. (2000) *Hum. Mol. Genet.* **9**, 453-460.
- Blagitko, N., Schulz, U., Schinzel, A. A., Ropers, H. H. & Kalscheuer, V. M. (1999) *Hum. Mol. Genet.* **8**, 2387-2396.
- Ono, R., Kobayashi, S., Wagatsuma, H., Aisaka, K., Kohda, T., Kaneko-Ishino, T. & Ishino, F. (2001) *Genomics* **73**, 232-237.
- Arima, T., Drewell, R. A., Oshimura, M., Wake, N. & Surani, M. A. (2000) *Genomics* **67**, 248-255.
- Alders, M., Ryan, A., Hodges, M., Bliet, J., Feinberg, A. P., Privitera, O., Westerveld, A., Little, P. F. & Mannens, M. (2000) *Am. J. Hum. Genet.* **66**, 1473-1484.
- MacDonald, H. R. & Wevrick, R. (1997) *Hum. Mol. Genet.* **6**, 1873-1878.
- Jinno, Y., Yun, K., Nishiwaki, K., Kubota, T., Ogawa, O., Reeve, A. E. & Niihara, N. (1994) *Nat. Genet.* **6**, 305-309.
- Mitsuya, K., Sui, H., Meguro, M., Kugoh, H., Jinno, Y., Niihara, N. & Oshimura, M. (1997) *Hum. Mol. Genet.* **6**, 2243-2246.
- Yoshihashi, H., Maeyama, K., Kosaki, R., Ogata, T., Tsukahara, M., Goto, Y., Hata, J., Matsuo, N., Smith, R. J. & Kosaki, K. (2000) *Am. J. Hum. Genet.* **67**, 476-482.
- Blagitko, N., Mergenthaler, S., Schulz, U., Wollmann, H. A., Craigen, W., Eggemann, T., Ropers, H. H. & Kalscheuer, V. M. (2000) *Hum. Mol. Genet.* **9**, 1587-1595.
- Rougeulle, C., Cardoso, C., Fontes, M., Collea, L. & Lalonde, M. (1998) *Nat. Genet.* **19**, 15-16.
- Jong, M. T. C., Gray, T. A., Ji, Y., Glenn, C. C., Saitoh, S., Driscoll, D. J. & Nicholls, R. D. (1999) *Hum. Mol. Genet.* **8**, 783-793.
- Xu, Y., Goodyer, C. G., Deal, C. & Polychronakos, C. (1993) *Biochem. Biophys. Res. Commun.* **197**, 747-754.
- Riesewijk, A. M., Schepens, M. T., Welch, T. R., van den Berg-Loonen, E. M., Mariman, E. M., Ropers, H. H. & Kalscheuer, V. M. (1996) *Genomics* **31**, 158-166.
- Moore, T., Constanca, M., Zubair, M., Balleu, B., Feil, R., Sasaki, H. & Reik, W. (1997) *Proc. Natl. Acad. Sci. USA* **94**, 12509-12514.
- Okutsu, T., Kuroiwa, Y., Kagitani, F., Kai, M., Aisaka, K., Tsutsumi, O., Kaneko, Y., Yokomori, K., Surani, M. A., Kohda, T., et al. (2000) *J. Biochem. (Tokyo)* **127**, 475-483.
- Kato, M. V., Shimizu, T., Nagayoshi, M., Kaneko, A., Sasaki, M. S. & Ikawa, Y. (1996) *Am. J. Hum. Genet.* **59**, 1084-1090.
- Alders, M., Hodges, M., Hadjantonakis, A. K., Postmus, J., van Wijk, I., Bliet, J., de Meulemeester, M., Westerveld, A., Guillemot, F., Oudejans, C., et al. (1997) *Hum. Mol. Genet.* **6**, 859-867.
- Westerman, B. A., Poutsma, A., Looijenga, L. H., Wouters, D., van Wijk, I. J. & Oudejans, C. B. (2001) *Placenta* **22**, 511-518.
- Miyoshi, N., Wagatsuma, H., Wakana, S., Shirosi, T., Nomura, M., Aisaka, K., Kohda, T., Surani, M. A., Kaneko-Ishino, T. & Ishino, F. (2000) *Genes Cells* **5**, 211-220.

**Table 1. Imprinted gene sample.**

The 31 imprinted genes from the human genome used in this study are listed, with references to their original imprinting studies, their genomic sequence accession numbers, and coordinates within these genomic sequences. Loci excluded are also listed with reasons for their exclusion briefly described. References are as listed.
