# Supplementary material
Source: PubMed Central journal article supplement (PMC117560)
Supplement: pnas_012539199_2.pdf [file pnas_012539199_2.pdf]

**Table 2. Control gene sample.**

|    | Chromosome | ACCESSION NUMBER | LOCUS           | CO-ORDINATES |          | 100 KB RANGE |          |
|----|------------|------------------|-----------------|--------------|----------|--------------|----------|
|    |            |                  |                 | 5'           | 3'       | FROM         | TO       |
| 1  | 22         | NT_011520.3      | <i>TIG-1</i>    | 198924       | 278943   | 148924       | 248924   |
| 2  |            |                  | <i>PIK4CA</i>   | 422816       | 395852   | 372816       | 472816   |
| 3  |            |                  | <i>SERPIND1</i> | 462248       | 475869   | 412248       | 512248   |
| 4  |            |                  | <i>SNAP29</i>   | 547186       | 576124   | 497186       | 597186   |
| 5  |            |                  | <i>CRKL</i>     | 605575       | 638453   | 555575       | 655575   |
| 6  |            |                  | <i>LZTR1</i>    | 670526       | 687211   | 620526       | 720526   |
| 7  |            |                  | <i>SLC7A4</i>   | 720002       | 716869   | 670002       | 770002   |
| 8  |            |                  | <i>UBE2L3</i>   | 1255866      | 1312168  | 1205866      | 1305866  |
| 9  |            |                  | <i>MAPK1</i>    | 1555774      | 1452190  | 1505774      | 1605774  |
| 10 |            |                  | <i>TOP3B</i>    | 1664025      | 1645249  | 1614025      | 1714025  |
| 11 |            |                  | <i>VPREB1</i>   | 1933071      | 1933594  | 1883071      | 1983071  |
| 12 |            |                  | <i>GNAZ</i>     | 2771719      | 2801058  | 2721719      | 2821719  |
| 13 |            |                  | <i>RAB36</i>    | 2821353      | 2840371  | 2771353      | 2871353  |
| 14 |            |                  | <i>IGLL1</i>    | 3256284      | 3249153  | 3206284      | 3306284  |
| 15 |            |                  | <i>VPREB3</i>   | 3430381      | 3428721  | 3380381      | 3480381  |
| 16 |            |                  | <i>MMP11</i>    | 3448823      | 3460289  | 3398823      | 3498823  |
| 17 |            |                  | <i>SMARCB1</i>  | 3463075      | 3510487  | 3413075      | 3513075  |
| 18 |            |                  | <i>MIF</i>      | 3570352      | 3571196  | 3520352      | 3620352  |
| 19 |            |                  | <i>GSTT2</i>    | 3637170      | 3633396  | 3587170      | 3687170  |
| 20 |            |                  | <i>DDT</i>      | 3637475      | 3643537  | 3587475      | 3687475  |
| 21 |            |                  | <i>KIAA0330</i> | 3687285      | 3854110  | 3637285      | 3737285  |
| 22 |            |                  | <i>BK65A6.2</i> | 3857002      | 3863918  | 3807002      | 3907002  |
| 23 |            |                  | <i>GGTLA1</i>   | 3920542      | 3895143  | 3870542      | 3970542  |
| 24 |            |                  | <i>ADORA2A</i>  | 4108606      | 4117814  | 4058606      | 4158606  |
| 25 |            |                  | <i>LOC51733</i> | 4170826      | 4202066  | 4120826      | 4220826  |
| 26 |            |                  | <i>SNRPD3</i>   | 4231486      | 4247618  | 4181486      | 4281486  |
| 27 |            |                  | <i>CRYBB3</i>   | 4875337      | 4882836  | 4825337      | 4925337  |
| 28 |            |                  | <i>CRYBB2</i>   | 4896897      | 4907336  | 4846897      | 4946897  |
| 29 |            |                  | <i>ADRBK2</i>   | 5240458      | 5399428  | 5190458      | 5290458  |
| 30 |            |                  | <i>SEZ6L</i>    | 5967729      | 6053254  | 5917729      | 6017729  |
| 31 |            |                  | <i>TIP39</i>    | 6187962      | 6166703  | 6137962      | 6237962  |
| 32 |            |                  | <i>TPST2</i>    | 6265565      | 6201230  | 6215565      | 6315565  |
| 33 |            |                  | <i>CRYBB1</i>   | 6293503      | 6274874  | 6243503      | 6343503  |
| 34 |            |                  | <i>CRYBA4</i>   | 6297440      | 6306144  | 6247440      | 6347440  |
| 35 |            |                  | <i>MN1</i>      | 7444237      | 7391016  | 7394237      | 7494237  |
| 36 |            |                  | <i>PITPNB</i>   | 7561975      | 7496099  | 7511975      | 7611975  |
| 37 |            |                  | <i>RAD53</i>    | 8377460      | 8330531  | 8327460      | 8427460  |
| 38 | 2          | NT_005322.3      | <i>CTNNA2</i>   | 1901088      | 1643148  | 1851088      | 1951088  |
| 39 |            |                  | <i>PAP</i>      | 3189717      | 3192463  | 3139717      | 3239717  |
| 40 |            |                  | <i>REGL</i>     | 3211068      | 3213967  | 3161068      | 3261068  |
| 41 |            |                  | <i>REG1A</i>    | 3227886      | 3226038  | 3177886      | 3277886  |
| 42 |            |                  | <i>REG1B</i>    | 3261453      | 3264415  | 3211453      | 3311453  |
| 43 | 3          | NT_005927.3      | <i>CHL1</i>     | 472456       | 684880   | 422456       | 522456   |
| 44 |            |                  | <i>CNTN6</i>    | 1368143      | 1678792  | 1318143      | 1418143  |
| 45 |            |                  | <i>IL5RA</i>    | 3386033      | 3345774  | 3336033      | 3436033  |
| 46 |            |                  | <i>SETMAR</i>   | 4579492      | 4589870  | 4529492      | 4629492  |
| 47 |            |                  | <i>ITPR1</i>    | 4769562      | 5123416  | 4719562      | 4819562  |
| 48 |            |                  | <i>BHLHB2</i>   | 5256881      | 5262534  | 5206881      | 5306881  |
| 49 |            |                  | <i>KIAA0212</i> | 5465113      | 5497319  | 5415113      | 5515113  |
| 50 |            |                  | <i>GRM7</i>     | 7423850      | 8018957  | 7373850      | 7473850  |
| 51 |            |                  | <i>LMCD1</i>    | 8781122      | 8848745  | 8731122      | 8831122  |
| 52 |            |                  | <i>NAG7</i>     | 8852830      | 8854528  | 8802830      | 8902830  |
| 53 |            |                  | <i>CAV3</i>     | 9195562      | 9208479  | 9145562      | 9245562  |
| 54 |            |                  | <i>OXTR</i>     | 9231335      | 9212131  | 9181335      | 9281335  |
| 55 |            |                  | <i>CAMK1</i>    | 10231689     | 10219095 | 10181689     | 10281689 |

|     |   |             |                  |          |          |          |          |
|-----|---|-------------|------------------|----------|----------|----------|----------|
| 56  |   |             | <i>TADA3L</i>    | 10253214 | 10242105 | 10203214 | 10303214 |
| 57  |   |             | <i>ARPC4</i>     | 10254855 | 10268243 | 10204855 | 10304855 |
| 58  |   |             | <i>DKFZP434I</i> | 10281511 | 10297152 | 10231511 | 10331511 |
| 59  |   |             | <i>DKFZP566I</i> | 10395584 | 10406776 | 10345584 | 10445584 |
| 60  |   |             | <i>MDS027</i>    | 10588947 | 10577434 | 10538947 | 10638947 |
| 61  |   |             | <i>VHL</i>       | 10603533 | 10615900 | 10553533 | 10653533 |
| 62  |   |             | <i>IRAK2</i>     | 10626707 | 10700799 | 10576707 | 10676707 |
| 63  |   |             | <i>KIAA0218</i>  | 10710295 | 10742981 | 10660295 | 10760295 |
| 64  |   |             | <i>LOC51738</i>  | 10751977 | 10747516 | 10701977 | 10801977 |
| 65  |   |             | <i>SEC13L1</i>   | 10782835 | 10762696 | 10732835 | 10832835 |
| 66  |   |             | <i>ATP2B2</i>    | 11081747 | 10789773 | 11031747 | 11131747 |
| 67  |   |             | <i>SLC6A11</i>   | 11278023 | 11400277 | 11228023 | 11328023 |
| 68  |   |             | <i>SLC6A1</i>    | 11477515 | 11499067 | 11427515 | 11527515 |
| 69  |   |             | <i>GSA7</i>      | 11760295 | 12016697 | 11710295 | 11810295 |
| 70  |   |             | <i>SYN2</i>      | 12466149 | 12645710 | 12416149 | 12516149 |
| 71  |   |             | <i>TIMP4</i>     | 12620578 | 12614753 | 12570578 | 12670578 |
| 72  | 4 | NT_006204.3 | <i>MMRN</i>      | 1854050  | 1795090  | 1804050  | 1904050  |
| 73  |   |             | <i>SNCA</i>      | 1911976  | 2023409  | 1861976  | 1961976  |
| 74  |   |             | <i>KIAA0914</i>  | 3102406  | 3214963  | 3052406  | 3152406  |
| 75  |   |             | <i>HERC3</i>     | 3443135  | 3232802  | 3393135  | 3493135  |
| 76  |   |             | <i>LOC51191</i>  | 3531721  | 3607216  | 3481721  | 3581721  |
| 77  | 5 | NT_006859.3 | <i>VDAC1</i>     | 874141   | 943123   | 824141   | 924141   |
| 78  |   |             | <i>HTGN29</i>    | 946254   | 967927   | 896254   | 996254   |
| 79  |   |             | <i>ADRB2</i>     | 2097900  | 2094454  | 2047900  | 2147900  |
| 80  |   |             | <i>SPINK1</i>    | 2302994  | 2310048  | 2252994  | 2352994  |
| 81  |   |             | <i>KIAA0555</i>  | 2352089  | 2527501  | 2302089  | 2402089  |
| 82  |   |             | <i>DPYSL3</i>    | 3013586  | 3070690  | 2963586  | 3063586  |
| 83  | 8 | NT_008251.3 | <i>FKSG2</i>     | 1462349  | 1463178  | 1412349  | 1512349  |
| 84  |   |             | <i>ASH2L</i>     | 2352228  | 2386228  | 2302228  | 2402228  |
| 85  |   |             | <i>STAR</i>      | 2397651  | 2390360  | 2347651  | 2447651  |
| 86  |   |             | <i>LSM1</i>      | 2423221  | 2410042  | 2373221  | 2473221  |
| 87  |   |             | <i>BAG4</i>      | 2423545  | 2468799  | 2373545  | 2473545  |
| 88  |   |             | <i>WHSC1L1</i>   | 2572817  | 2559459  | 2522817  | 2622817  |
| 89  |   |             | <i>FGFR1</i>     | 2705296  | 2649465  | 2655296  | 2755296  |
| 90  |   |             | <i>TACC1</i>     | 3095643  | 3209259  | 3045643  | 3145643  |
| 91  | 9 | NT_017568.3 | <i>ZFP37</i>     | 69711    | 54889    | 19711    | 119711   |
| 92  |   |             | <i>SLC31A2</i>   | 186064   | 191255   | 136064   | 236064   |
| 93  |   |             | <i>CHRAC17</i>   | 438843   | 437360   | 388843   | 488843   |
| 94  |   |             | <i>TNFSF8</i>    | 1919225  | 1891652  | 1869225  | 1969225  |
| 95  |   |             | <i>DEC1</i>      | 2157077  | 2432070  | 2107077  | 2207077  |
| 96  |   |             | <i>PAPPA</i>     | 3182858  | 3406573  | 3132858  | 3232858  |
| 97  |   |             | <i>RBP4</i>      | 4163238  | 4172634  | 4113238  | 4213238  |
| 98  |   |             | <i>CYP26A1</i>   | 4889125  | 4891804  | 4839125  | 4939125  |
| 99  |   |             | <i>IDE</i>       | 5310286  | 5430153  | 5260286  | 5360286  |
| 100 |   |             | <i>PPP1R5</i>    | 6278127  | 6281367  | 6228127  | 6328127  |

**Table 2. Control gene sample.**

The 100 control genes from nonimprinted, well sequenced regions of the genome are listed with their genomic accession numbers and sequence coordinates.
