# Supplementary material
Source: PubMed Central journal article supplement (PMC117560)
Supplement: pnas_012539199_3.pdf [file pnas_012539199_3.pdf]

**Table 3. Regression analyses on control gene sample (n=100).**

|                                  | L1%      | L2 %     | L3 %     | ALU      | MIR      | MaLRs    | ERV_L    | ERV_I    | ERV_II   | MER1     | MER2     | totalCpG100 | totalCpG4 | totalCpGdinuc100 | OECpGdinuc100      |
|----------------------------------|----------|----------|----------|----------|----------|----------|----------|----------|----------|----------|----------|-------------|-----------|------------------|--------------------|
| GC%                              | 3.05E-10 | 4.50E-01 | 4.40E-01 | 2.38E-07 | 4.95E-01 | 1.33E-06 | 1.94E-03 | 2.27E-02 | 6.00E-03 | 3.80E-01 | 8.57E-04 | 1.06E-07    | 3.63E-01  | 1.98E-30         | 1.16E-08           |
| L1%                              |          | 5.80E-01 | 7.35E-01 | 9.49E-07 | 5.14E-02 | 6.90E-06 | 3.43E-04 | 9.45E-04 | 2.42E-02 | 6.49E-01 | 2.66E-02 | 6.28E-04    | 7.83E-01  | 7.14E-10         | 1.92E-05           |
| L2 %                             |          |          | 5.23E-02 | 3.97E-04 | 3.55E-14 | 1.23E-01 | 4.67E-01 | 8.73E-03 | 3.69E-01 | 1.05E-05 | 8.61E-01 | 4.98E-01    | 5.18E-01  | 1.84E-02         | 2.23E-03           |
| L3 %                             |          |          |          | 9.46E-02 | 1.77E-02 | 2.40E-01 | 4.15E-01 | 1.15E-01 | 3.37E-01 | 5.31E-01 | 4.49E-01 | 5.28E-02    | 4.22E-01  | 3.83E-02         | 2.94E-03           |
| ALU                              |          |          |          |          | 1.51E-03 | 1.08E-06 | 2.02E-04 | 1.07E-01 | 1.74E-01 | 1.02E-02 | 2.03E-02 | 4.51E-07    | 2.16E-02  | 1.07E-15         | 6.54E-22           |
| MIR                              |          |          |          |          |          | 4.37E-01 | 6.82E-01 | 4.65E-04 | 6.46E-01 | 3.31E-12 | 5.34E-01 | 2.48E-01    | 9.24E-01  | 1.41E-01         | 2.48E-03           |
| MaLRs                            |          |          |          |          |          |          | 1.66E-02 |          | 4.56E-02 | 5.14E-01 | 3.54E-03 | 3.55E-03    | 5.26E-01  | 2.73E-08         | 2.13E-06           |
| ERV_L                            |          |          |          |          |          |          |          | 1.63E-04 | 3.86E-01 | 6.32E-02 | 1.78E-02 | 9.44E-04    | 3.41E-01  | 2.54E-05         | 1.46E-06           |
| ERV_I                            |          |          |          |          |          |          |          |          | 9.28E-01 | 3.35E-03 | 2.37E-04 | 1.14E-02    | 5.85E-02  | 1.32E-02         | 2.94E-02           |
| ERV_II                           |          |          |          |          |          |          |          |          |          | 2.56E-01 | 3.86E-01 | 5.05E-01    | 9.99E-02  | 2.28E-02         | 2.05E-01           |
| MER1                             |          |          |          |          |          |          |          |          |          |          | 3.52E-01 | 3.45E-02    | 3.69E-01  | 6.67E-02         | 4.66E-02           |
| MER2                             |          |          |          |          |          |          |          |          |          |          |          | 1.20E-01    | 5.49E-01  | 2.77E-03         | 5.01E-02           |
| totalCpG100                      |          |          |          |          |          |          |          |          |          |          |          |             | 1.36E-05  | 3.67E-14         | 3.17E-16           |
| totalCpG4                        |          |          |          |          |          |          |          |          |          |          |          |             |           | 2.80E-02         | 7.02E-04           |
| totalCpGdinuc100                 |          |          |          |          |          |          |          |          |          |          |          |             |           |                  | 4.98E-31           |
| OECpGdinuc100                    |          |          |          |          |          |          |          |          |          |          |          |             |           |                  |                    |
| sum                              | 3.05E-10 | 1.03E+00 | 1.23E+00 | 9.50E-02 | 5.66E-01 | 8.00E-01 | 1.58E+00 | 2.56E-01 | 2.92E+00 | 2.41E+00 | 2.65E+00 | 1.47E+00    | 4.97E+00  | 3.31E-01         | 3.39E-01           |
| TOTAL                            |          |          |          |          |          |          |          |          |          |          |          |             |           |                  | 2.06E+01           |
| Number of tests                  |          |          |          |          |          |          |          |          |          |          |          |             |           |                  | 120                |
| mean p value                     |          |          |          |          |          |          |          |          |          |          |          |             |           |                  | 1.72E-01           |
| Adjusted (Bonferroni correction) |          |          |          |          |          |          |          |          |          |          |          |             |           |                  | <b>0.000427353</b> |

|                             |
|-----------------------------|
| Significant results shaded  |
| Blue: positive regression   |
| Orange: negative regression |

**Table 3. Linear regression analyses.**

The results of linear regression analyses with *P* values are shown. Shading indicates significant positive (blue) or negative (orange) results following a Bonferroni correction to reset the threshold of significance for an of 0.05 within the context of these multiple analyses.
